# Supplementary material
Source: PubMed Central journal article supplement (PMC5359024)
Supplement: NIHMS847463-supplement-supplement_1.pdf [file NIHMS847463-supplement-supplement_1.pdf]

## SUPPLEMENTAL MATERIAL

**Table E1. Cortical and Medullary MTR at baseline and after 2, 4, 6, weeks of RAS**

|                      | Baseline         | 2 Weeks            | 4 Weeks              | 6 Weeks              |
|----------------------|------------------|--------------------|----------------------|----------------------|
| Sham Kidney          |                  |                    |                      |                      |
| Cortex               | 0.50 (0.49-0.52) | 0.51 (0.50-0.52)   | 0.49 (0.48-0.50)     | 0.52 (0.48-0.54)     |
| Medulla              | 0.50 (0.48-0.52) | 0.50 (0.48-0.50)   | 0.47 (0.47-0.49)     | 0.50 (0.49-0.51)     |
| Stenotic Kidney      |                  |                    |                      |                      |
| Cortex               | 0.51 (0.50-0.54) | 0.56 (0.55-0.58)*† | 0.58 (0.55-0.59)*†   | 0.58 (0.56-0.58)*†   |
| Medulla              | 0.50 (0.48-0.51) | 0.47 (0.45-0.47)*† | 0.60 (0.57-0.62)*\$† | 0.60 (0.57-0.63)*\$† |
| Contralateral Kidney |                  |                    |                      |                      |
| Cortex               | 0.53 (0.52-0.56) | 0.54 (0.52-0.58)   | 0.52 (0.51-0.53)\$   | 0.52 (0.50-0.53)*\$  |
| Medulla              | 0.52 (0.50-0.55) | 0.52 (0.51-0.54)   | 0.50 (0.48-0.52)\$   | 0.50 (0.48-0.51)*\$  |

Note.— Data are medians with interquartile ranges in parentheses. \*P<0.05 compared to baseline, \$P<0.05 compared to 2 weeks, †P<0.05 compared to sham. MTR=magnetization transfer ratio. RAS=renal artery stenosis.

**Table E2. Cortical and Medullary R<sub>2</sub>\* at baseline and after 2, 4, 6, weeks of RAS**

|                      | Baseline      | 2 Weeks         | 4 Weeks           | 6 Weeks           |
|----------------------|---------------|-----------------|-------------------|-------------------|
| Sham Kidney          |               |                 |                   |                   |
| Cortex               | 139 (130-142) | 146 (128-160)   | 136 (130-161)     | 149 (134-160)     |
| Medulla              | 136 (129-156) | 151 (129-174)   | 147 (132-175)     | 155 (143-174)     |
| Stenotic Kidney      |               |                 |                   |                   |
| Cortex               | 140 (125-168) | 177 (150-201)*† | 193 (181-218)*†   | 210 (182-276)*\$† |
| Medulla              | 131 (126-172) | 106 (100-126)*† | 190 (172-235)*\$† | 254 (173-325)*\$† |
| Contralateral Kidney |               |                 |                   |                   |
| Cortex               | 137 (127-160) | 139 (123-148)   | 157 (149-164)     | 138 (126-150)     |
| Medulla              | 133 (130-138) | 144 (125-158)   | 150 (142-160)     | 142 (118-159)     |

Note.— Data are medians with interquartile ranges in parentheses. \*P<0.05 compared to baseline, \$P<0.05 compared to 2 weeks, †P<0.05 compared to sham. RAS=renal artery stenosis.

**Table E3. Interobserver Bias and Variation in Cortical and Medullary MTR at 6 weeks of RAS**

|         | Sham Kidney         | Stenotic Kidney     | Contralateral Kidney |
|---------|---------------------|---------------------|----------------------|
| Cortex  | 0.15% (0.07%-0.57%) | 1.08% (0.66%-1.33%) | 0.28% (0.16%-0.50%)  |
| Medulla | 0.54% (0.43%-0.64%) | 1.11% (0.62%-2.31%) | 0.16% (0.08%-0.27%)  |

Note.— Data are medians with interquartile ranges in parentheses. MTR=magnetization transfer ratio, RAS=renal artery stenosis.

## FIGURE LEGENDS

**Figure E1:** Representative MTR maps with the number of MT pulses at 1 **(a)**, 2 **(b)** and 3 **(c)** in mouse kidneys at 2 weeks of renal artery stenosis. Based on the collagen phantom study, the MT pulse irradiation-offset frequency and bandwidth were set at 1500Hz and 300Hz, respectively. The MT pulse power was empirically set at 10 $\mu$ T, which resulted in a flip-angle of 585°.

**Figure E2:** Renal Fibrosis in mice after 2 weeks of renal artery stenosis. Representative trichrome staining **(a)**, Sirius red staining viewed under polarized light **(b)** at a magnification of x10, and corresponding MTR map **(c)** of a stenotic kidney at 2 weeks of renal artery stenosis. Areas representing fibrosis and edema are marked by red and white arrows, respectively.

**Figure E3:** Spaghetti plots showing longitudinal changes in cortical **(a)** and medullary **(b)** MTR in the stenotic and sham kidneys.
